# Supplementary material
Source: PubMed Central journal article supplement (PMC4425591)

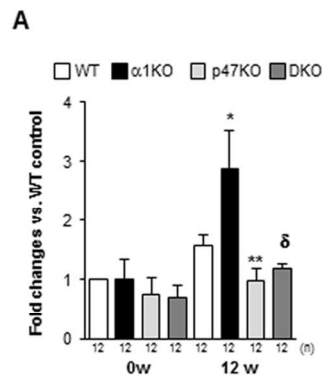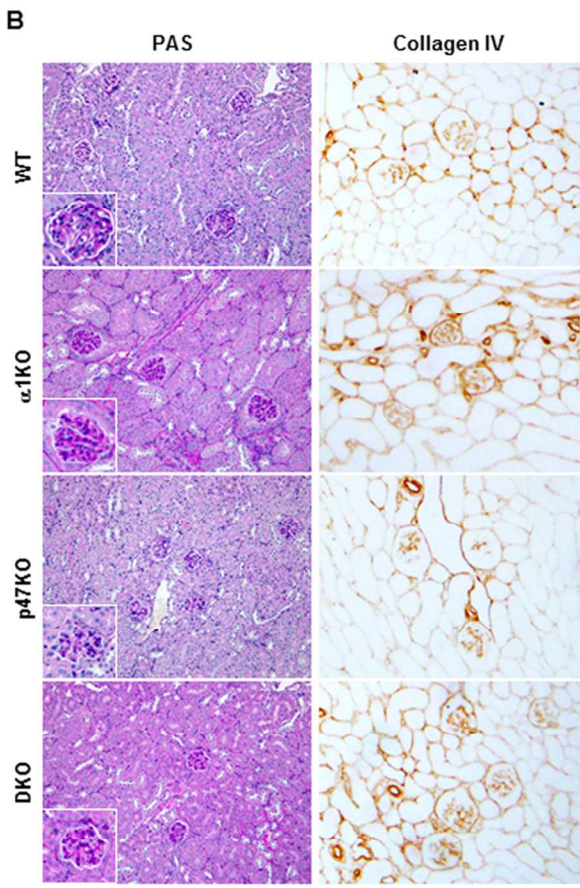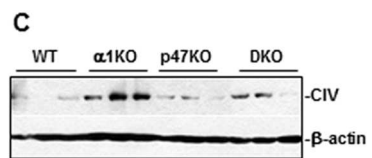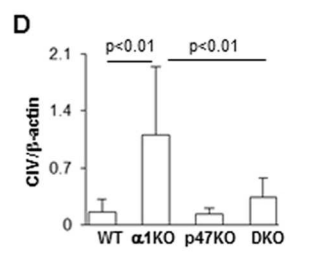

99x94mm (300 x 300 DPI)

Supplement: NIHMS644125-supplement-supplement_1.pdf [file NIHMS644125-supplement-supplement_1.pdf]
